# Supplementary material for: Bunyaviral N Proteins Localize at RNA Processing Bodies and Stress Granules: The Enigma of Cytoplasmic Sources of Capped RNA for Cap Snatching
Source: MDPI journal article supplement (doi:10.3390/v14081679), 2022-07-29
Supplement: s1 [file s1]

**A**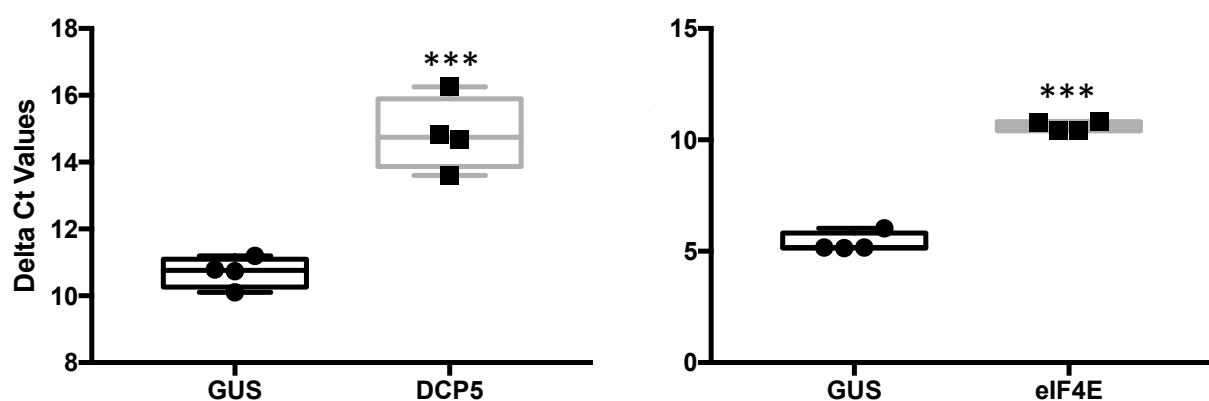**B**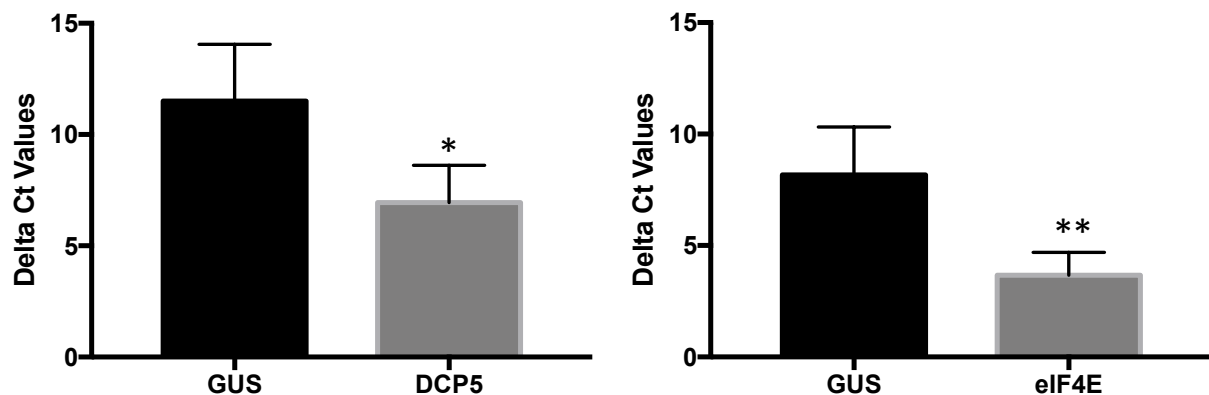

**Supplemental Figure S1.** The effect of silencing of DCP5 and eIF4E on viral replication. **(A)** qRT-PCR assay to quantify the silencing efficiency. \* p-value < 0.05, \*\* p-value < 0.01, \*\*\* p-value < 0.001. **(B)** TSWV titer represented by N gene expression value on silenced plants and control plants. \* p-value < 0.05, \*\* p-value < 0.01, \*\*\* p-value < 0.001
