# Supplementary material for: Bunyaviral N Proteins Localize at RNA Processing Bodies and Stress Granules: The Enigma of Cytoplasmic Sources of Capped RNA for Cap Snatching
Source: MDPI journal article supplement (doi:10.3390/v14081679), 2022-07-29
Supplement: s1 [file s1]

Table S1: Primers used in this study.

| Name                 | Sequence                                                 |
|----------------------|----------------------------------------------------------|
| F_SacII_eGFP         | AACCGCGGATGGTGAGCAAGGGCGAG                               |
| R_SacII_eGFP         | AACCGCGGTTACTTGTACAGCTCGTC                               |
| F_SacII_mRFP         | ACCGCGGATGGCCTCCTCCGAGGAC                                |
| R_SacII_mRFP_stop    | ACCGCGGTTAGGCGCCGGTGGA                                   |
| F_attB1_N_TSWV       | GGGGACAAGTTTGTACAAAAAAGCAGGCTTAACCATGTCTAAGGTTAAGCTCACT  |
| R_attB2_N_TSWV       | GGGGACCACTTTGTACAAGAAAGCTGGGTAAGCAAGTTCTGCGAGTTT         |
| F_attB1_N_SBV        | GGGGACAAGTTTGTACAAAAAAGCAGGCTTAACCATGTCAAGCCAATTCATTTTT  |
| R_attB2_N_SBV        | GGGGACCACTTTGTACAAGAAAGCTGGGTAGATGTTGATACCGAATTG         |
| F_attB1_N_SNV        | GGGGACAAGTTTGTACAAAAAAGCAGGCTTAACCATGAGCACCCCTCAAAGAAGTG |
| R_attB2_N_SNV        | GGGGACCACTTTGTACAAGAAAGCTGGGTAAAGTTTAAGTGGTCTTG          |
| F_attB1_adapt        | GGGGACAAGTTTGTACAAAAAAGCAGGC                             |
| R_attB2_adapt        | GGGGACCACTTTGTACAAGAAAGCTGGGT                            |
| F_attB1_CCHFV_N      | CAAAAAAGCAGGCTCCACCATGGAACAAAAATCGAAG                    |
| R_attB2_CCHFV_N      | CAAGAAAGCTGGGTAGCGCCACATCATCT                            |
| F_attb1_G3BP1        | GGGGACAAGTTTGTACAAAAAAGCAGGCTCCACCATGGTGATGGAGAAGC       |
| R_attb2_G3BP1        | GGGGACCACTTTGTACAAGAAAGCTGGGTACTGCCGTGGCGCAAGC           |
| F_attB1_caprin1      | GGGGACAAGTTTGTACAAAAAAGCAGGCTCCACCATGCCCTCGGCCACC        |
| R_attB1_caprin1      | GGGGACCACTTTGTACAAGAAAGCTGGGTAATTCACCTTGCTGAGTGTTTCAT    |
| F_attB1_DCP1A        | GGGGACAAGTTTGTACAAAAAAGCAGGCTCCACCATGGAGGCGCTGAGT        |
| R_attB2_DCP1A        | GGGGACCACTTTGTACAAGAAAGCTGGGTATAGGTTGTGGTTGCTTTG         |
| F_q_PCR_G3BP         | AGTAGAGGAACCTGAAGAAAGACAGC                               |
| R_q_PCR_G3BP         | CCATGTCTACTGACAACCTGCCTG                                 |
| F_q_PCR_GAPDH        | CACCAGGGCTGCTTTTAAGTC                                    |
| R_q_PCR_GAPDH        | GGAATTTGCCATGGGTGGAATC                                   |
| F_q_PCR_SBV          | TCAGATTGTCATGCCCTTGC                                     |
| R_q_PCR_SBV          | TTCGGCCCCAGGTGCAAATC                                     |
| F_DCP1a_qPCR         | TATCACCAGCATCGCAGACC                                     |
| R_DCP1a_qPCR         | TGGTAAGGGGAAGCTGACCT                                     |
| F_attB1_N_EMARaV     | GGGGACAAGTTTGTACAAAAAAGCTGAACAGATGCCTATTATTCCAAAGCC      |
| R_attB2_N_EMARaV     | GGGGACCACTTTGTACAAGAAAGCTGAACCTTGTGGTTGTTTTGAAGCTTTC     |
| F_attB1_N_RSV        | GGGGACAAGTTTGTACAAAAAAGCTGAACAGATGGGTACCAACAAGCCAG       |
| R_attB2_N_RSV        | GGGGACCACTTTGTACAAGAAAGCTGAACCTCTAGTCATCTGCACCTTCTGC     |
| F_RNAi_Nb-eIF4E-like | GGGGACAAGTTTGTACAAAAAAGCTGAACAGGGAAGTGGACAATGAGCTTTTC    |
| R_RNAi_Nb-eIF4E-like | GGGGACCACTTTGTACAAGAAAGCTGAACCTCTACGCAGAATAACGATTCTTGG   |
| F_BglII_AteiF4E      | GAAGATCTATGGCGGTAGAAACACTCC                              |
| R_BglII_AteiF4E      | GAAGATCTTCAAGCGGTGTAAGCGTTC                              |
| F_BglII_AtTZF1       | GAAGATCTATGATCGGCGAAAATAAAACC                            |
| R_BglII_AtTZF1       | GAAGATCTACCGAGTGAGTTCTCTCTACTGAG                         |
| F_RNAi_Nb-DCP5       | GGGGACAAGTTTGTACAAAAAAGCTGAACAGAATCTGTCAAGATCATCTCTC     |
| R_RNAi_Nb-DCP5       | GGGGACCACTTTGTACAAGAAAGCTGAACCTTCTGTGTGTGGCCTTTAC        |
| F_q_PCR_TSWV         | GCTTCCACCCCTTTGATT                                       |
| R_q_PCR_TSWV         | TCCCAGGTCCTTGTATT                                        |
| F_q_PCR_eif4E-like   | GTGAGGTGGAAGAGGAAGG                                      |
| R_q_PCR_eif4E-like   | GGAGAAGGTGTAAATGGGTC                                     |
| F_q_PCR_DCP5         | AATAACGGTGTCTGCTCTG                                      |
| R_q_PCR_DCP5         | CAGTTTGCGAGATTGTGG                                       |
| F_q_PCR_actin        | TCCTGATGGGCAAGTGATTAC                                    |
| R_q_PCR_actin        | TTGTATGTGGTCTCGTGGATTG                                   |
| F_q_PCR_EF1a         | AGCTTTACCTCCCAAGTCATC                                    |
| R_q_PCR_EF1a         | AGAACGCCTGTCAATCTTGG                                     |
| RBP47_qPCR_F         | GGTCTCCGTGAAAATACCTGC                                    |
| RBP47_qPCR_R         | GAAAGACGAACCTGCCTGCTT                                    |
| RBP47_RNAi_F         | GGGGACAAGTTTGTACAAAAAAGCAGGCTTATAGCACTGGTGAAAAGCGTG      |
| RBP47_RNAi_R         | GGGGACCACTTTGTACAAGAAAGCTGGGTATTGTTGCTGTGCTGATGGTT       |
| G3BP_RNAi_F          | GGGGACAAGTTTGTACAAAAAAGCAGGCTTAATGATGCAGTCCAGTTCCA       |
| G3BP_RNAi_R          | GGGGACCACTTTGTACAAGAAAGCTGGGTACTAGAAGGTGCTGGAGGAGG       |
| G3BP_qPCR_F          | TGTGGTCGAGGAGAAGAGGT                                     |
| G3BP_qPCR_R          | TAACCCCTGCCACCTCCATA                                     |
| Nbeif4a-RNAi-F       | GGGGACAAGTTTGTACAAAAAAGCAGGCTTAcaactttctgctctggagt       |
| Nbeif4a-RNAi-R       | GGGGACCACTTTGTACAAGAAAGCTGGGTAtccttgaacaccttgagagc       |
| UPF1_RNAi-F          | GGGGACAAGTTTGTACAAAAAAGCAGGCTTAATTGCGTTATTTCAGGGGATGC    |
| UPF1_RNAi-R          | GGGGACCACTTTGTACAAGAAAGCTGGGTACCAAAACGGCGAGGAAGTGTA      |
